# Supplementary material for: Zinc oxide nanoparticles conjugated with clinically-approved medicines as potential antibacterial molecules
Source: PubMed Central journal article supplement (PMC8272778; doi:10.1186/s13568-021-01261-1), 2021-07-10

Manuscript title: Zinc oxide nanoparticles conjugated with clinically-approved medicines as potential antibacterial molecules

<sup>1</sup>Noor Akbar<sup>†</sup>, <sup>2</sup>Zara Aslam<sup>†</sup>, <sup>1</sup>Ruqaiyyah Siddiqui, <sup>2</sup>Muhammad Raza Shah, <sup>3</sup>\*Naveed Ahmed Khan.

<sup>1</sup>College of Arts and Sciences, American University of Sharjah, University City, Sharjah 26666, United Arab Emirates; <sup>2</sup>H.E.J. Research Institute of Chemistry, International Centre for Chemical and Biological Sciences, University of Karachi, Karachi, 75270, Pakistan;

<sup>3</sup>Department of Clinical Sciences, College of Medicine, University of Sharjah, University City, Sharjah, 27272, Unites Arab Emirates.

<sup>†</sup> Both authors contributed equally.

Running title: ZnO drugs and antibacterials

\*Corresponding address: N. A. Khan, Department of Clinical Sciences, College of Medicine, University of Sharjah, University City, Sharjah, 27272, Unites Arab Emirates.

Tel: +971-6505-7722. Fax. +971-6515-7244. E-mail: [naveed5438@gmail.com](mailto:naveed5438@gmail.com)

**Figure S1.** Chemical structure of drugs **(a)** quercetin (QT), **(b)** naringin (NAR), **(c)** ceftriaxone (CFT), **(d)** ampicillin (AMP) and **(e)** amphotericin B (AMB)

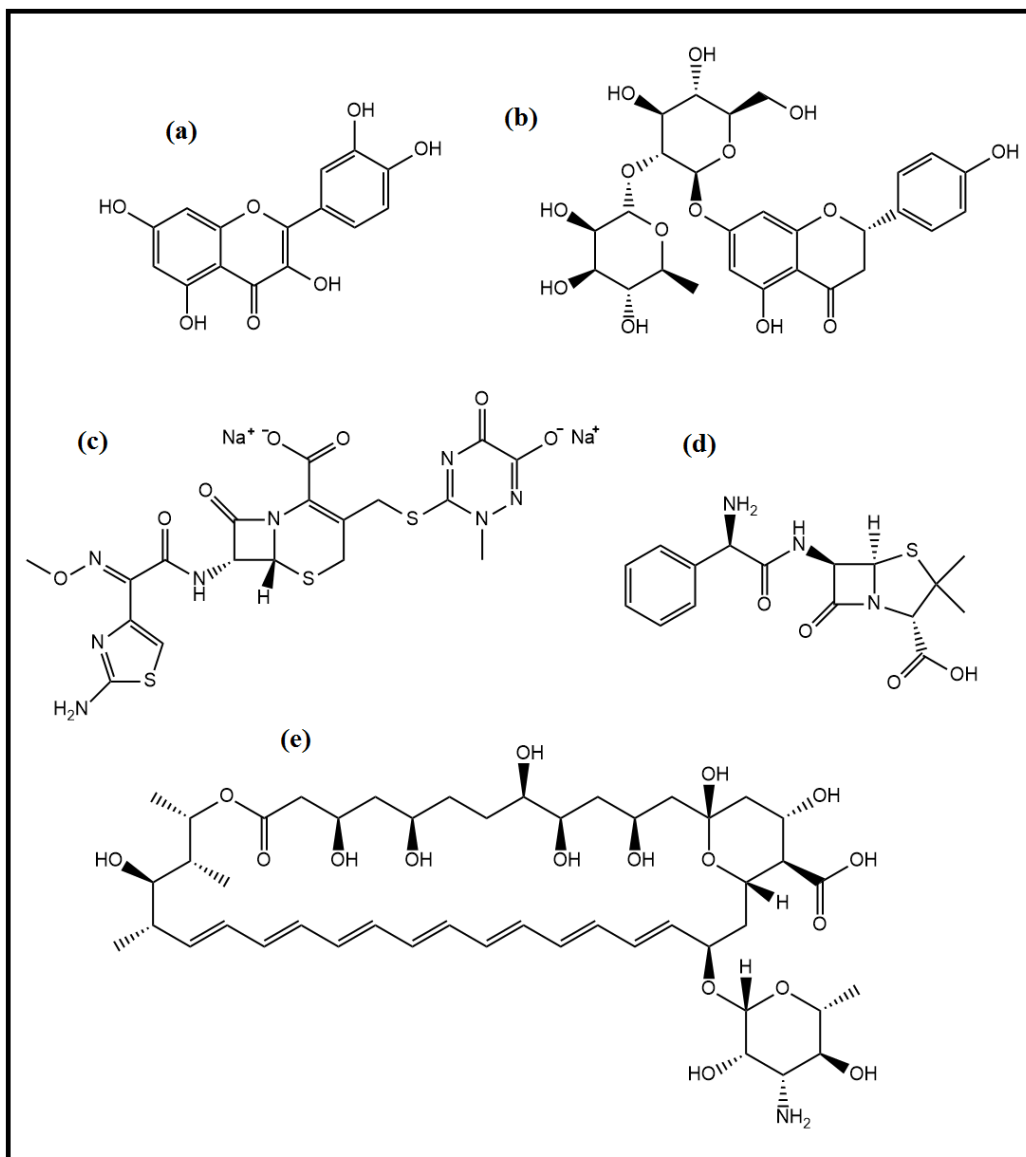

Figure S2. Calibration curve of quercetin (QT)

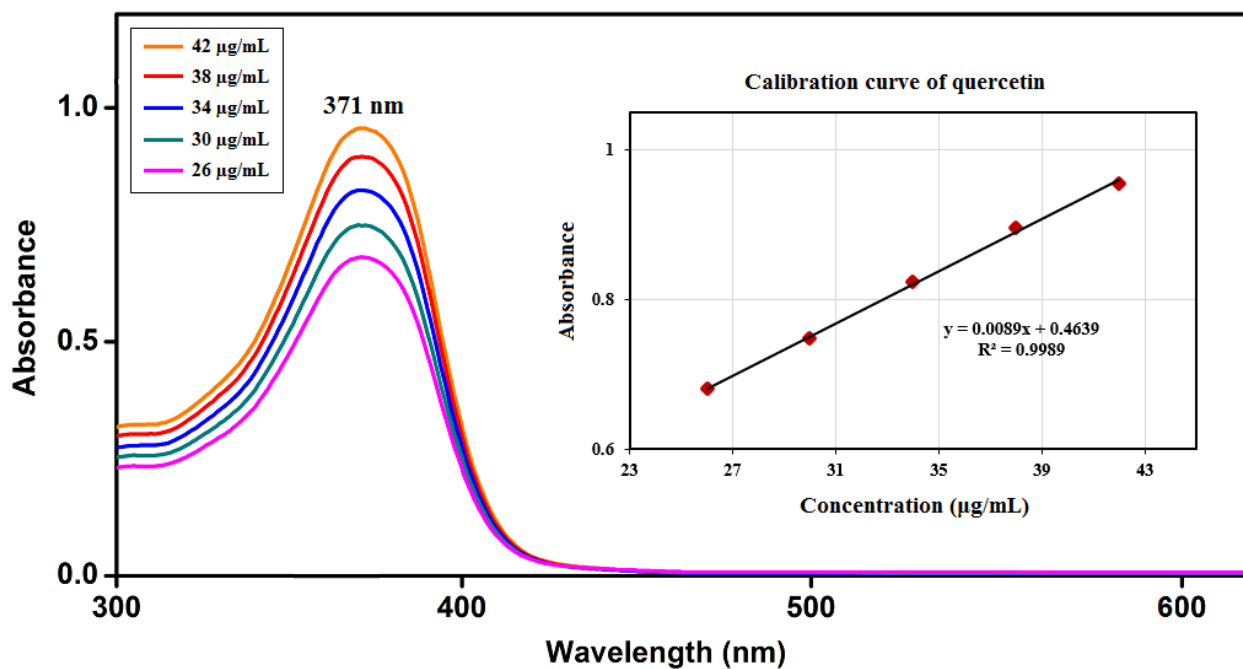

Figure S3. Calibration curve of naringin (NAR)

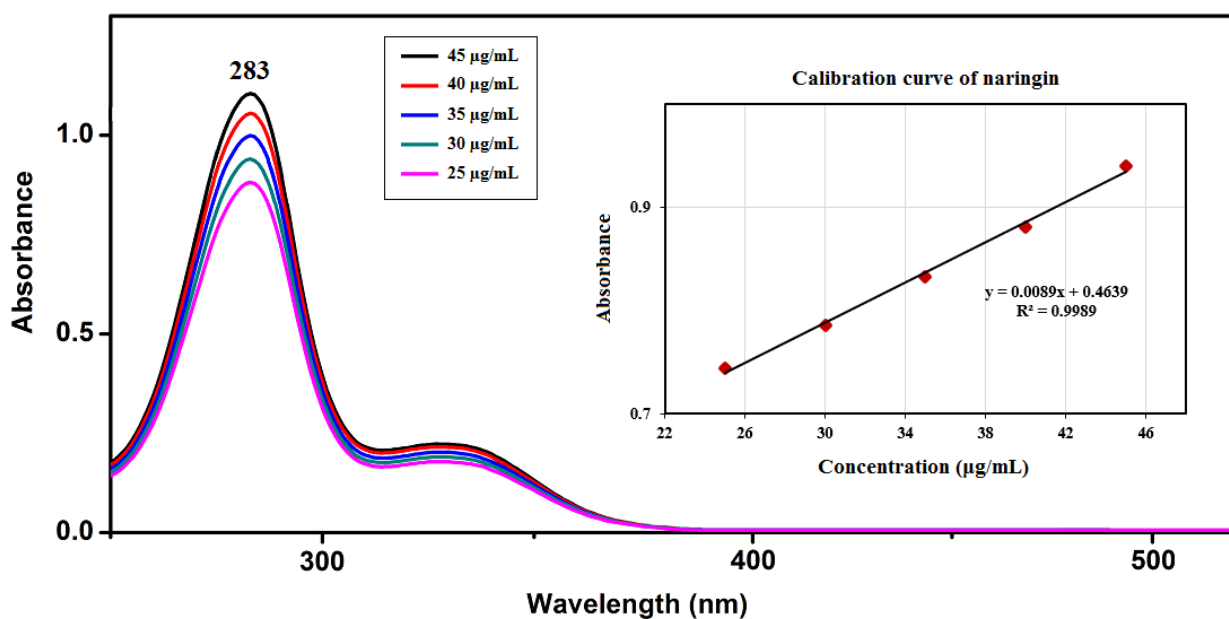

Figure S4. Calibration curve of ceftriaxone (CFT)

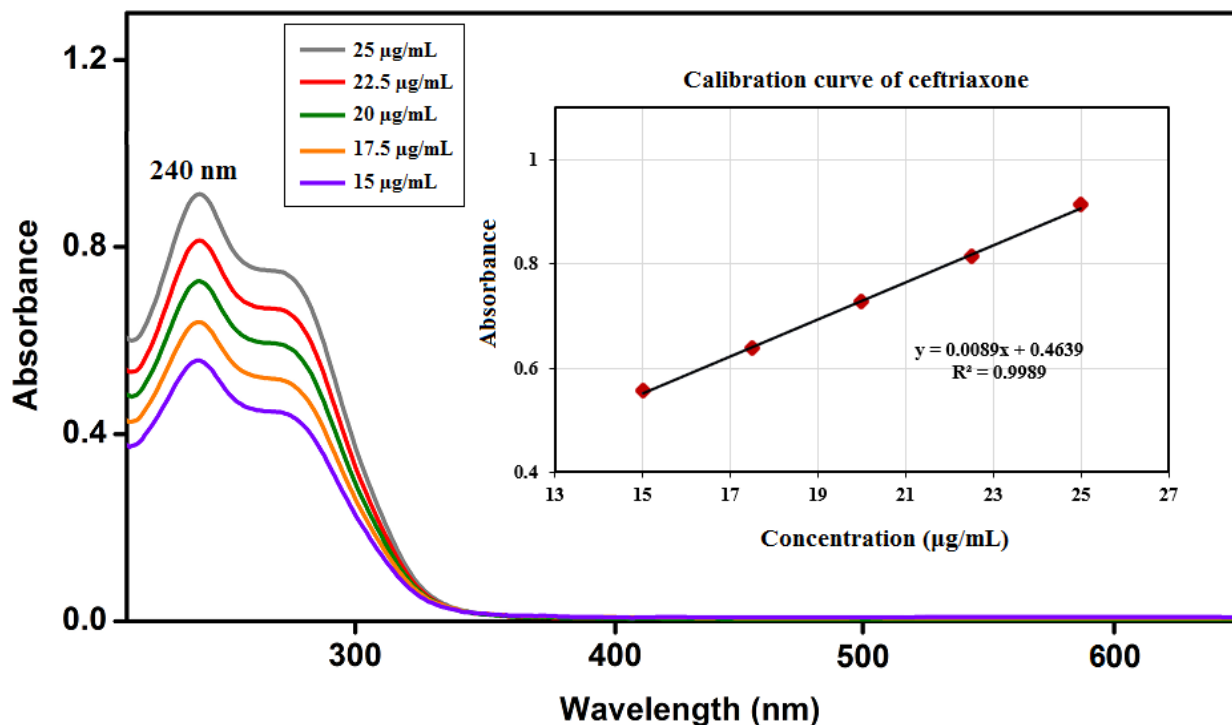

Figure S5. Calibration curve of ampicillin (AMP)

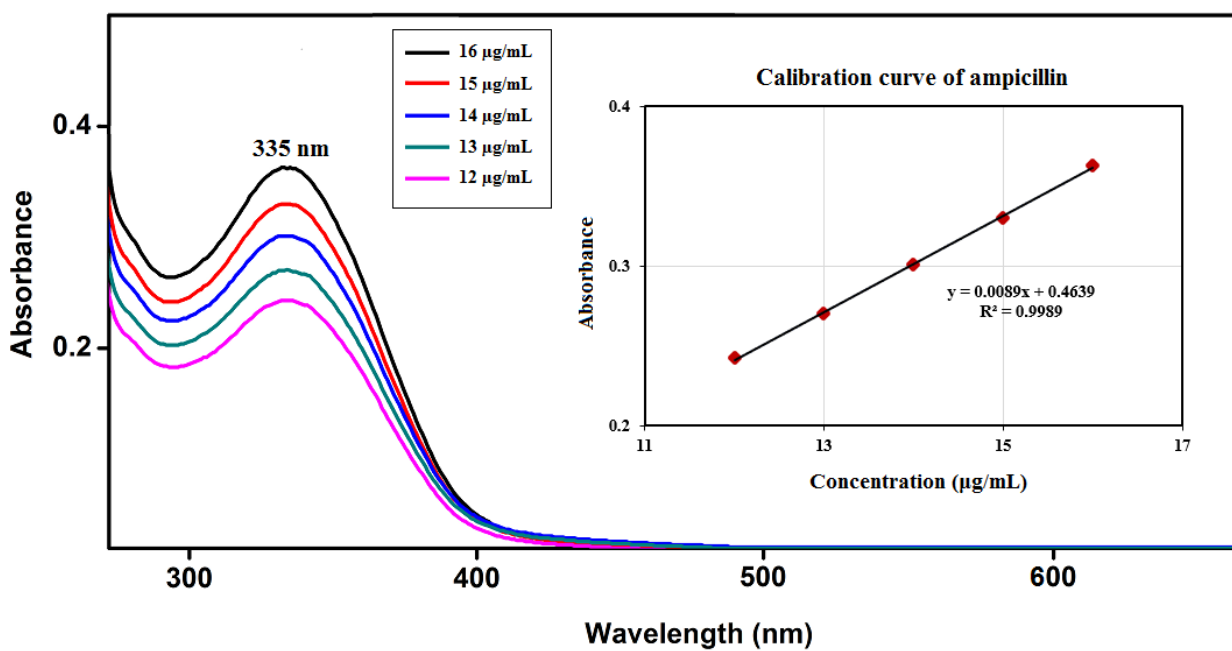

**Figure S6.** Calibration curve of amphotericin B (AMB)

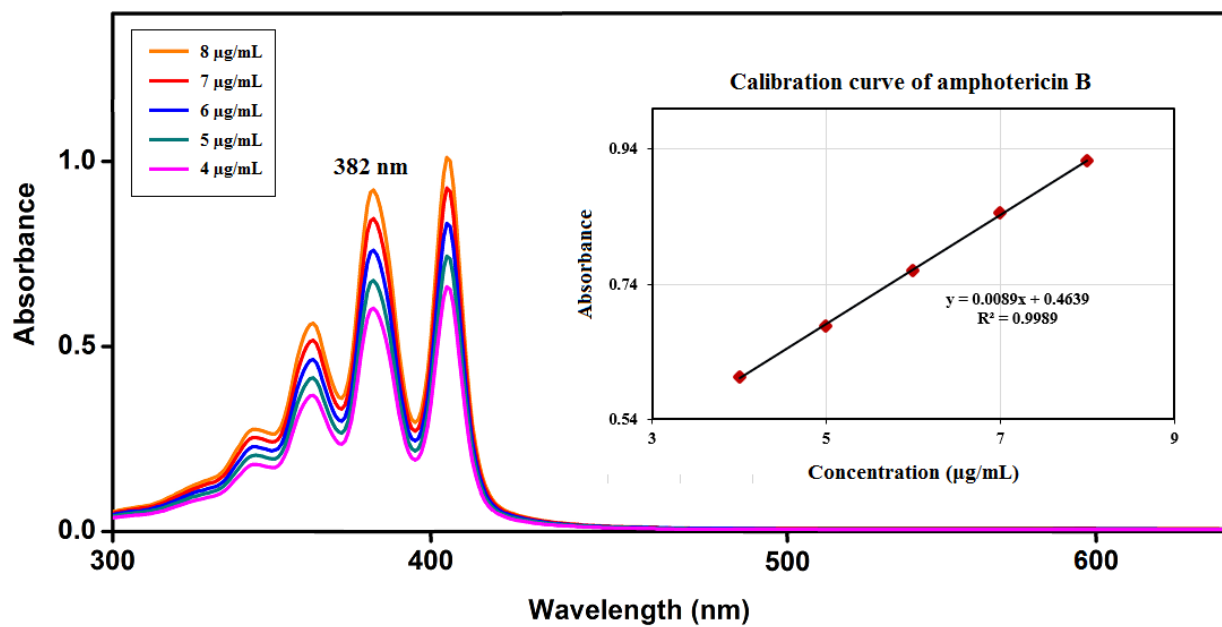

Supplement: 13568_2021_1261_MOESM1_ESM.pdf [file 13568_2021_1261_MOESM1_ESM.pdf]
